# Supplementary material for: Acceptability and Receipt of Preventive Care for Chronic-Disease Health Risk Behaviors Reported by Clients of Community Mental Health Services
Source: Atypon-hosted journal article supplement (doi:10.1176/appi.ps.201400360), 2015-05-01
Supplement: appi.ps.201400360.ds001.pdf [file appi.ps.201400360.ds001.pdf]

Supplementary Table 1. *p*-values for the chi-squared associations between diagnostic variables and number of appointments with receipt of assessment and complete care variables

|                                                | Smoking<br>Assessment | Nutrition<br>Assessment | Alcohol<br>Assessment | Physical<br>Activity<br>Assessment | Smoking<br>Complete<br>Care | Nutrition<br>Complete<br>Care | Alcohol<br>Complete<br>Care | Physical<br>Activity<br>Complete<br>Care |
|------------------------------------------------|-----------------------|-------------------------|-----------------------|------------------------------------|-----------------------------|-------------------------------|-----------------------------|------------------------------------------|
| Depression                                     | .96                   | .44                     | .12*                  | .82                                | .29                         | .67                           | .85                         | .76                                      |
| Bi-polar disorder                              | .80                   | .40                     | .56                   | .61                                | .69                         | .72                           | .11*                        | .53                                      |
| Schizophrenia/other<br>psychotic illness       | .51                   | .63                     | .13*                  | .52                                | .56                         | .35                           | .002*                       | .64                                      |
| Anxiety disorder                               | .40                   | .38                     | .79                   | .37                                | .16*                        | .98                           | .26                         | .98                                      |
| Other mental illness                           | .88                   | .42                     | .69                   | .12*                               | .30                         | .46                           | .001*                       | .43                                      |
| Heart diseases/stroke                          | .24*                  | .69                     | .17*                  | .17*                               | .30                         | .86                           | .70                         | .16*                                     |
| Diabetes                                       | .66                   | .05*                    | .73                   | .99                                | .34                         | .02*                          | 1.00                        | .005*                                    |
| Cancers                                        | .66                   | .59                     | .51                   | .45                                | .35                         | .02*                          | .29*                        | .86                                      |
| Respiratory                                    | .66                   | .69                     | .43                   | .06*                               | .77                         | .03*                          | .67                         | .97                                      |
| Number of<br>appointments in last<br>12 months | .10*                  | .06                     | .71                   | <.001*                             | .11*                        | .36                           | .003*                       | .12*                                     |

\* Variable entered into backwards stepwise regression model
